# Supplementary material for: In situ fabrication of porous-carbon-supported α-MnO2 nanorods at room temperature: application for rechargeable Li–O2 batteries
Source: Royal Society of Chemistry journal article supplement (doi:10.1039/c2ee23621d), 2012-12-04
Supplement: c2ee23621d.pdf [file c2ee23621d.pdf]

## Supporting Information

### In-situ Fabrication of Porous-Carbon-Supported $\alpha$ -MnO<sub>2</sub> Nanorods at Room Temperature: Application for Rechargeable Li-O<sub>2</sub> Battery

Yan Qin,<sup>a†</sup> Jun Lu,<sup>a†</sup> Peng Du,<sup>a</sup> Zonghai Chen,<sup>a</sup> Yang Ren,<sup>b</sup> Tianpin Wu,<sup>a</sup> Jeffery T. Miller,<sup>a</sup> Jianguo Wen,  
Dean J. Miller,<sup>c</sup> Zhengcheng Zhang,<sup>a</sup> and Khalil Amine<sup>a\*</sup>

<sup>a</sup> Chemical Science and Engineering Division

<sup>b</sup> X-ray Science Division, Advanced Photon Sources

<sup>c</sup> Electron Microscopy Center, Material Science Division

Argonne National Laboratory, 9700 South Cass Avenue, Lemont, IL 60439, USA

#### Electrochemical performance of Sample 2 (50% MnO<sub>2</sub> on carbon):

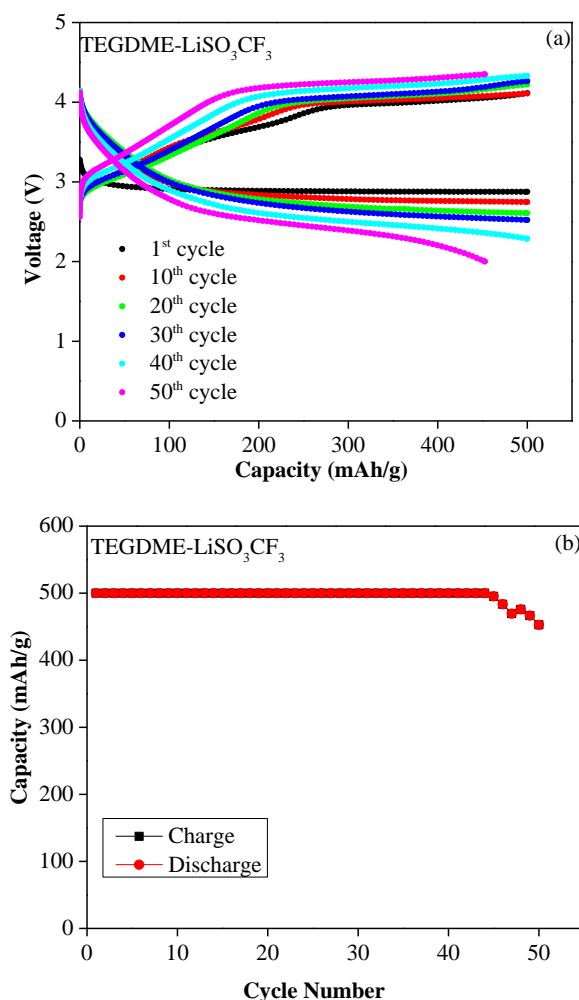

Figure S1. (a) Discharge and charge profiles of a Li-O<sub>2</sub> cell containing 50% MnO<sub>2</sub> in carbon matrix using TEGDME/ LiCF<sub>3</sub>SO<sub>3</sub> electrolyte between 2.2 and 4.3 V versus Li/Li<sup>+</sup> with limited capacity of 500 mAh/g at a constant current density of 100 mA/g (carbon catalyst); (b) Cyclability of the same cell shown in (a).
